# Supplementary material
Source: Springer Nature journal article supplement (https://www.springermedizin.de/resource/supplementary/12936_2009_1084_MOESM2_ESM.pdf/9549662)

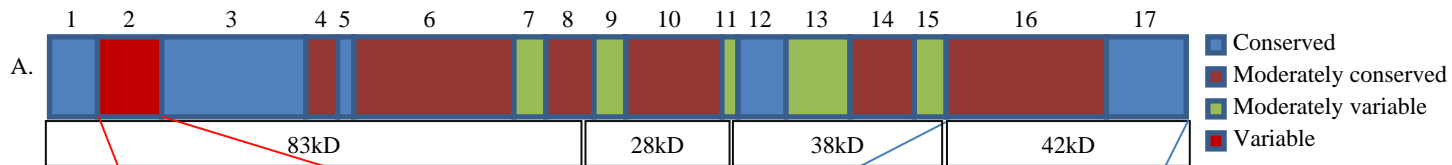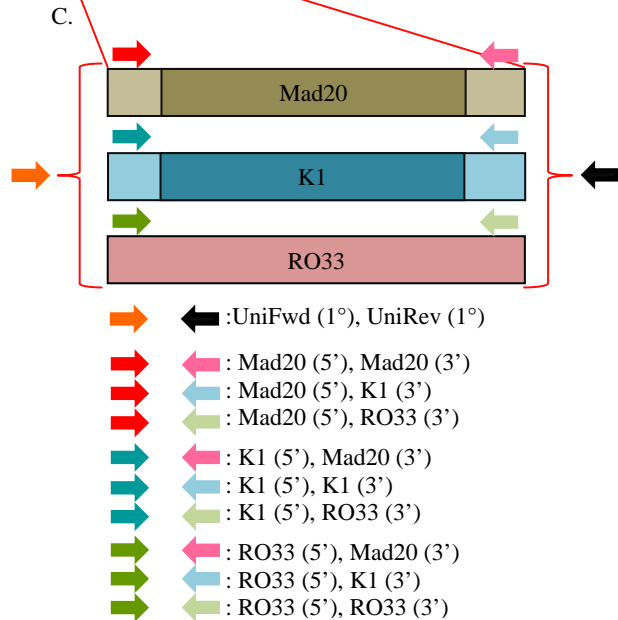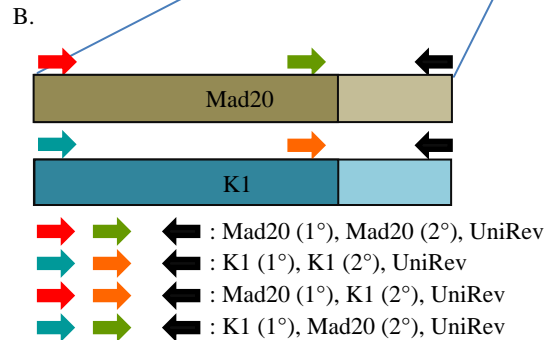

Supplement: MOESM2 [file 9549662]
